1 **“He stepped on my belly” An exploration of Intimate Partner Violence Experience**  
2 **and Coping Strategies among Pregnant Women in Southwestern-Uganda**

3 Eve Katushabe<sup>1,2</sup>, JohnBosco Ndinawe<sup>3</sup>, Abeneitwe Editor<sup>2</sup>, Katusiime Agnes<sup>2</sup>, Gladys  
4 Nakidde<sup>2</sup>, John Baptist Asiimwe<sup>4</sup>, Vincent Batwala<sup>5</sup>

5 <sup>1</sup> Department of Community Health, Mbarara University of Science and Technology,  
6 P.O. Box 1410, Mbarara City, Uganda.

7 <sup>2</sup>Department of Nursing, Bishop Stuart University, P. O. Box 09, Mbarara City, Uganda.

8 <sup>3</sup>Road to Care, Kampala City, Uganda

9 <sup>4</sup>School of Nursing and Midwifery, Aga Khan University, Uganda Campus, Kampala  
10 City, Uganda

11 <sup>5</sup>Directorate of Research and Graduate Training, Mbarara University of Science and  
12 Technology, P. O. Box 1410, Mbarara City, Uganda.

13 Corresponding author

14 Email: [ekatushabe@nhs.bsu.ac.ug](mailto:ekatushabe@nhs.bsu.ac.ug) (EK)

15

16

17

18

19

20

21

22

23

24

25

26 **Abstract**

27 Intimate Partner Violence (IPV) associated with pregnancy remains a challenge globally  
28 and in the Ugandan context. However, literature on IPV experiences, support seeking and  
29 coping strategies during pregnancy remains limited in Uganda. This study explored the  
30 pregnant women's IPV experiences, support seeking and coping strategies in  
31 Southwestern Uganda. Pregnant women with IPV experience during the index pregnancy  
32 were purposively approached for in-depth interviews and saturation of data was reached  
33 at 25 respondents. Data was analyzed inductively using thematic analysis.

34 Women voiced experiences of IPV that included partners: spending nights away from  
35 home without any communication, refusal of accompaniment for antenatal care contacts,  
36 uncomfortable sexual intercourse positions, forced sexual intercourse, being slapped,  
37 punched, and kicked, failure to pay bills like rent, children's school fees, transport money  
38 to seek medical care and food. Women preferred sharing IPV experiences with their  
39 biological mothers to midwives or any other person and some kept it to themselves. The  
40 main support given by their support systems was encouraging the victims to try and  
41 maintain their marriage and keeping quiet when the partner starts quarreling. Women  
42 coped by confiding in their relatives, keeping silent, self-consolation, tolerance of the  
43 perpetrator since they financially depended on them, distracting bad thoughts through  
44 thinking about good things like friends, self-blame and praying to God. Pregnant women  
45 did not understand the role of midwives in IPV nor did the midwives' inquire about the  
46 IPV experience during Antenatal care contacts.

47 The findings of this study point to the need for the Health system to incorporate a user  
48 friendly IPV screening tool onto the ANC card to enhance routine IPV screening by

49 midwives and recruit counselors and peer supporters to assist midwives in providing  
50 individualized psychological support.

51 **Keywords:** Intimate Partner Violence, Coping, Pregnancy, midwives' role, Uganda

## 52 **Introduction**

53 Intimate partner violence (IPV) is a public health problem and has been recognized as a  
54 serious social issue<sup>(1, 2)</sup> which affects all women irrespective of cultural or religious  
55 affiliation, socioeconomic and education background<sup>(3, 4)</sup>. IPV manifests in forms of  
56 physical, sexual, psychological<sup>(5, 6)</sup> and economic abuse<sup>(7, 8)</sup>. In addition to other forms of  
57 violence, economic violence has been identified more recently as another form of IPV. It  
58 involves behaviors that control the victim's power to get, use and maintain resources  
59 hence lowering the victim's economic security and possibility for self-sufficiency<sup>(9)</sup>.  
60 Furthermore, economic violence affects both the woman and children since it contributes  
61 to home instabilities especially when the perpetrators neglect their role as family  
62 breadwinners which is contrary to the African culture<sup>(10, 11)</sup>. Globally, it is known that  
63 one in three women experience IPV in their life time, with African countries ranking  
64 highest<sup>(12)</sup> and reporting IPV in pregnancy at 66.9% in Kenya, 18.8% in Tanzania, 41.1%,  
65 59% in Ethiopia and 61.8% in Gambia<sup>(13-17)</sup>. In Uganda among women of the  
66 reproductive age (15-49 years), 40% of the ever married experienced IPV<sup>(18)</sup> and  
67 according to the Uganda Bureau of Statistics (UBOS), perinatal IPV was reported at  
68 10.6%, while IPV during the index pregnancy at 27.8% in Eastern Uganda and 70.3% in  
69 Southwestern Uganda<sup>(18-20)</sup>.

70 Occurrence of IPV negatively affects pregnancy outcomes for both mother and infant <sup>(21,</sup>  
71 <sup>22)</sup>. Earlier studies reported that women experiencing IPV during pregnancy are at a  
72 higher risk of chronic stress<sup>(23)</sup>, spontaneous abortion, delayed antenatal care first contact,  
73 sexually transmitted diseases acquisition, antepartum hemorrhage, trauma related to IPV,  
74 feeling of defenselessness and other health problems <sup>(18, 24-28)</sup>. These may lead to serious  
75 mental health problems like substance and alcohol abuse, depression and suicidal  
76 tendencies <sup>(25, 28-32)</sup>. Effects on the baby include: premature rupture of membranes, risk of  
77 preterm birth, low birth weight, fetal injuries, perinatal and neonatal mortality <sup>(25, 28, 33, 34)</sup>.  
78 Pregnant women experience shame, fear and stigma following IPV episodes, which  
79 significantly contributes to victim isolation and concealment of her experiences yet  
80 involving other people can be a strategy to cope with the violence<sup>(35, 36)</sup>. nevertheless  
81 some studies indicate that a number of victims will seek support in severe IPV cases<sup>(37)</sup>,  
82 which helps them in dealing with the traumatizing life events <sup>(38)</sup>. Studies report that IPV  
83 victims adapting certain coping strategies have lower risks of suffering from alexithymia  
84 and depression<sup>(39, 40)</sup>. The identified coping strategies include: using various distracters to  
85 avoid bad feelings like watching movies, singing and talking to friends averting their  
86 intimate partners' attention and protesting against violence<sup>(38, 41)</sup>, and seeking social  
87 support, problem solving and self-re-examination, dedication to religion which involves  
88 praying, reading the Bible and visiting pastors for counseling and prayers<sup>(42-45)</sup>. Some  
89 victims adopt coping strategies like fighting back or shaming the partner by disclosing  
90 the violent behavior beyond family members to co-workers or friends, self- blame <sup>(43, 44)</sup>,  
91 acceptance, using emotion-focused strategies which include substance use (including  
92 alcohol, other drugs) <sup>(43)</sup>. Coping strategies commonly in African settings include: self-re-

93 examination, devotion to religion and quest for informal social support. These practices  
94 can positively or negatively impact onto ones' mental or physical health<sup>(41)</sup>.  
95 Concentrating on coping strategies used by women can be helpful in developing focused  
96 IPV management interventions<sup>(46)</sup>. Pregnancy provides a unique opportunity for health  
97 care providers to connect with women in time enabling identification of IPV experiences  
98 and its distinct effects<sup>(47)</sup>, as they come for ANC contacts. Currently women in Uganda  
99 are recommended to have eight<sup>(8)</sup> contacts with care providers during pregnancy and IPV  
100 screening is an important ANC package for every woman<sup>(48)</sup>. Though the Uganda  
101 clinical guidelines (UCG) recommends IPV screening during the prenatal period<sup>(49)</sup>, there  
102 is a paucity of documented information regarding qualitative inquiry of pregnant  
103 women's IPV experiences and their coping strategies.

104 Many studies have reported IPV experience, prevalence and associated factors during  
105 pregnancy using quantitative methods<sup>(6, 19)</sup>. Therefore, our aim was to explore IPV  
106 experiences, coping and support seeking strategies among pregnant women attending a  
107 city hospital in Southwestern Uganda.

## 108 **Materials and Methods**

109 This study was carried out within a larger study titled "Intimate partner violence  
110 disclosure among pregnant women attending a health facility in South Western Uganda"  
111 An interpretive phenomenological qualitative study design was employed to explore  
112 pregnant women's IPV experiences, support seeking and their coping strategies.

113 The study was conducted at the ANC clinic of a high-volume City hospital for a period of  
114 one month from 7<sup>th</sup> January 2019 to 7<sup>th</sup> February 2019. The hospital operates a daily  
115 general outpatient, Antenatal, Family planning and Young Child Clinics; and an inpatient

116 Maternity Ward where normal deliveries, assisted and operative deliveries are conducted.  
117 The facility ANC monthly attendance was 800 (including new and re-attendance) as per  
118 2018 Hospital database (both new ANC cases and re-attendance). These ANC  
119 consultations for all low risk pregnant women are managed by midwives on a daily basis  
120 Monday to Friday excluding Thursday which is strictly for pregnant women living with  
121 Human Immune Virus (HIV) and high risk cases are managed by the medical officer with  
122 room for referral to the nearby Regional Referral Hospital. Participants aged 15 and  
123 above in a larger cohort of 199 pregnant women that had experienced at least one form of  
124 IPV were enrolled for the in depth interviews.  
125 Purposeful sampling (50) was used to select pregnant women that had experienced IPV.  
126 The sample size was a maximum of 25 respondents; this was guided by the saturation of  
127 data attained during the in-depth interviews.  
128 An In-depth interview guide was used. We pre-tested the interview guide on five  
129 pregnant women attending ANC from a different health facility. Ambiguous questions in  
130 the guide were amended for clarity before data collection commenced. The interview  
131 guide contained questions on the bio-demographic characteristics (Age, tribe, level of  
132 education), probing questions about the type of IPV experienced “What form of intimate  
133 partner violence (IPV) have you experienced during this current pregnancy?” How did  
134 you feel when this was experienced?: “What did you do when this happened?”: “Why did  
135 you do that?”: “Have you ever told any midwife voluntarily about the IPV experience?”:  
136 “Have you ever been asked by a midwife about IPV during pregnancy”: “What do you do  
137 to cope with the violent partner? “The interview guide was informed by literature on IPV  
138 (13, 37, 43, 51).

139 We carried out in-depth interviews which were audio recorded and field notes were  
140 taken. Each interview took between 45 to 60 minutes. The interviews were majorly  
141 carried out in the local language Runyankole to ensure the best quality of data since it is  
142 the commonly used language in the area.

143 Interviews were conducted by KE who is experienced in collecting qualitative data and  
144 two baccalaureate nurses who were trained in qualitative data collection.

145 The first author and interviewer introduced the study to the health facility in-charge and  
146 other health care providers in person to introduce the study and create rapport.  
147 Participants were informed that participation is voluntary and decision to withdraw  
148 wouldn't affect their routine care. Recruitment was done at the exit after receiving all the  
149 ANC services. In-depth interviews were carried out in the ANC clinic private rooms  
150 which prevented interruptions and supported privacy. Before each interview session,  
151 written informed consent was obtained. Data identifiers were not considered to maintain  
152 confidentiality and data safety, therefore pseudonyms or false names have been used in  
153 this study.

154 Data was analyzed using thematic analysis approach. Thematic analysis was selected for  
155 the study as it allows analysis and understanding of the meaning of various coded  
156 responses from interviews in their right context<sup>(52)</sup>. Initially interviews were transcribed  
157 in Runyankore and then translated into English. Transcription and translation were done  
158 by KE and NJB and these checked themselves. The translated scripts were repetitively  
159 read by three researchers individually to familiarize themselves to the data and pinpoint  
160 significant responses connected to the study objectives as well as distinctive responses to  
161 the prompts consequently inductive coding was done. After finding repetitive

162 expressions, responses that included the expressions were highlighted and color coded in  
163 each interview. The color coded phrases were grouped into categories and the categories  
164 structured into themes. During this analysis, themes directly connected to the study  
165 objectives were identified. In addition, emergent and new themes were also established.  
166 The themes were revised by the team for accuracy and to authenticate that they  
167 represented the correct description of the respondents. Inductive thematic data saturation  
168 was achieved by ensuring that no more new codes or themes were identified during  
169 analysis. This shows that majority of the codes were recognized during the first  
170 interviews, followed by decreasing codes identified from the rest of the interviews.

#### 171 **Ethical considerations**

172 The research protocol was reviewed and approved by the Research Ethics Committee of  
173 Mbarara University of Science and Technology (Ref: MUREC# 22/09-18). The WHO  
174 guidelines on “Ethical and safety recommendations for research on Intimate partner  
175 violence against women”(53) were followed. Study methods were executed in agreement  
176 with the guidelines and regulations of the Declaration of Helsinki to uphold ethical  
177 standards and respect for the respondents to ensure their safety and protected their health  
178 and rights (54). Informed Consent was sought from all study respondents for individual  
179 interviews at the time of data collection, enrolled pregnant women of 15 to 17 years of  
180 age; need for consent was waived by the research ethics committee and were considered  
181 as emancipated minors. The participants were informed that no identity would be used so  
182 participants were referred to using pseudonyms names. Interviews were carried out in  
183 private rooms by female interviewers to minimize under reporting of IPV experiences. A  
184 trained counselor was recruited for the study to emotionally support women that had



185 distress, only two sought for support from the study counselor. No cash incentives were  
186 provided, only refreshment in form of a soft drink and a cup cake were given to each  
187 respondent to prevent hypoglycemia.

#### 188 **Rigor and trustworthiness of data**

189 Guba and Lincoln's criteria including credibility, dependability, confirmability and  
190 transferability were followed to achieve rigor and confidence in the study findings<sup>(55)</sup>.

191 To maintain credibility of the results, the research team conducted training meetings and  
192 pilot interviews. Each of the interviewers conducted two pilot interviews to perfect the  
193 overall process using the interview guide, time-management and the overall  
194 administration of the interviews. The analyzers had prolonged engagement with the data.

195 Also the multidisciplinary background of the research team in midwifery, nursing, public  
196 health and health service research enabled us to interpret the findings. These features  
197 guaranteed that data collection and content were consistent.

198 For dependability the study to dispose of individual analyst predisposition, the three team  
199 members (KE, NJB and AJB) were responsible for reading the translated scripts, as well  
200 as independently coding and generating meaning out of the data. The individual data was  
201 then compiled by the three analysts and evaluated for consistency. Any analyses that  
202 were inconsistent or equivocal were discussed amongst the analysts and interpretations  
203 clarified until there was consensus among all the three analysts.

204 For confirmability the analysis was conducted by the research team who had diverse  
205 perspectives to the data interpretation. Each analyst used a separate reflexive journal to  
206 record different issues that could have affected the analysis process this contributed to  
207 appreciation of collective interpretation of the findings. We also used recorded audios

208 and investigators' field notes as a form of triangulation to validate the data collected. This  
209 enabled us to eliminate potential individual investigators' predisposition and achieve  
210 neutral findings reflecting information from the respondents.

211 To ensure transferability purposive sampling was employed to form a nominated sample  
212 of pregnant women who had experienced IPV and we gave an adequate description of the  
213 study site and the respondents

## 214 **Results**

215 The reported results are derived from In-depth interviews with pregnant women  
216 experiencing IPV. Data from interviews are presented in form of cases with direct  
217 quotations from the respondents and pseudonyms have been used hereunder.

### 218 **Characteristics of respondents**

219 Majority of the participants (56%) were aged 15-25 [range 19 -34] years. Some 64%  
220 were in the second trimester, 40% prime gravidae, 40% had small businesses (including  
221 tomato and charcoal selling) while 56% had attained secondary level of education, most  
222 participants were married (n=92%), the remaining 4% abandoned by partner after  
223 awareness of conception, the other 4% runaway after conception due to unbearable  
224 violence as shown in table 1 below.

225 **Table 1 Characteristics of the participants (n=25)**

| <b>Variable</b>   | <b>Category</b>      | <b>Frequency (%)</b> |
|-------------------|----------------------|----------------------|
| <b>Age(Years)</b> | 15 – 25              | 14 (56)              |
|                   | 26 – 35              | 11 (44)              |
| <b>Trimester</b>  | 1 <sup>st</sup>      | 3(12)                |
|                   | 2 <sup>nd</sup>      | 16(64)               |
|                   | 3 <sup>rd</sup>      | 6 (24)               |
| <b>Gravida</b>    | 1                    | 10(40)               |
|                   | 2                    | 5(20)                |
|                   | 3                    | 6(24)                |
|                   | ≥4                   | 4(16)                |
| <b>Occupation</b> | Salaried job         | 6(24)                |
|                   | Small scale business | 10(40)               |

|                        |                     |        |
|------------------------|---------------------|--------|
|                        | Housewife           | 5(20)  |
|                        | Others              | 4(16)  |
| <b>Education level</b> | No formal education | 1(4)   |
|                        | Primary level       | 4(16)  |
|                        | Secondary level     | 14(56) |
|                        | Tertiary level      | 6(24)  |
| Marital status         | Married             | 23(92) |
|                        | Not married         | 2(8%)  |

226

## 227 **Themes**

228 Responses from the participants were categorized into four major themes: IPV  
229 experiences, support seeking, coping strategies and with intergenerational continuation of  
230 IPV. Within each theme, multiple sub-themes were generated to explain the phenomenon  
231 better.

### 232 **Theme one: Various experiences by pregnant women**

233 Participants' narratives highlighted various experiences of IPV which were categorized  
234 as: Psychological, physical, sexual and economic violence.

#### 235 **Psychological violence**

236 This was experienced in different forms that include: talking rudely, accused of  
237 extramarital affairs, partner receiving phone calls late at night, spending nights outside  
238 home, abandoned after conception, refusal to accompany women while attending ANC,  
239 chased with a crying child at night and Children witnessing the violence.

240 Intimate partner talking rudely was commonly voiced by pregnant women in the study.

241 This made pregnant women sad and frightened by the perpetrator.

242 *When we are in the house he can talk to me with a loud voice, it makes me feel bad and I  
243 get scared of him” (Maureen).*

244 *“He talks to me with a loud voice and he doesn't care whether I get angry or not”  
245 (Beatrice)*

246 Most of the pregnant women were accused by their intimate partners of having  
247 extramarital affairs and had a tendency to get angry when they found other men talking to  
248 these women even in public places. Some were accused of having extra marital affairs  
249 with brother in-laws as long as women were out of the intimate partner's vicinity. This

250 caused psychological trauma since some of these women would be in their gardens  
251 toiling for the family welfare.

252 *He thinks I have other men yet, I have a shop most of my customers are men but when he*  
253 *finds me talking to them he becomes angry” (Annette).*

254

255 *“He gets mad at me when he finds me talking to other men and wants me to explain what*  
256 *we were talking about, imagine that!”( Meron)*

257 *“My husband remains in bed, after he accuses me to have sexual relations with his*  
258 *brother yet I’m always in the garden working with his mother” (Rehema).*

259 Intimate partners receiving phone calls late in the night was a common occurrence among  
260 pregnant women, claiming that their partners talked for a longtime and were very much  
261 suspicious that it were other women they communicated to. This made the victims  
262 uncomfortable.

263 *“He receives phone calls at night from other women and he talks for a very long time, it*  
264 *annoys me” (Annette)*

265 *“He receives phone calls late in the night almost every day, I have complained most of*  
266 *the times but he cannot listen to me, it bothers me” (Godwin)*

267 Some women voiced that their partners spent nights outside their home without prior  
268 notification. This brought mixed feelings of insecurity and fear, wondering if there is  
269 another woman and sometimes questioning if he is not in any danger. Some women were  
270 told by their intimate partners that since they own the home they can always come back  
271 home anytime they wished and women shouldn’t intervene in anyway.

272 *“Sometimes he does not spend nights at home, he does not tell me where he is, it keeps*  
273 *me imagining a lot of things.....” (Imelda).*

274 *Most of the times he comes home towards morning, I cannot tell where he is always*  
275 *coming from, when I ask him he tells me that it’s his house and he can come back*  
276 *anytime he wants....bursts into tears (Beatrice )*

277 Some women revealed that the intimate partners abandoned them, blocked their  
278 telephone numbers after discovering about the pregnancy. This was often preceded by  
279 convincing the women to abort since the partners were not interested in the pregnancy.

280 *“My partner impregnated me, when I told him that am pregnant he told me to abort I*  
281 *refused, and then he abandoned me and blocked me on his phone right now I can’t tell*  
282 *his where about” (Imelda).*

283 *At first everything was fine, but when I told him that I’m pregnant his behaviors changed,*  
284 *he told me to abort and I refused, one night he strangled me like he wanted to kill me, I*  
285 *managed to run away and never went back...” (Irene)*

286 Pregnant women expressed concern about their intimate partners failing to accompany  
287 them as they seek health care. Some voiced how their intimate partners refuse to escort  
288 them for antenatal care attendance claiming that it’s a waste of time.

289 *“He refuses to escort me to the health facility that it’s a waste of time for example when*  
290 *going for Antenatal care” (Sarah).*

291 *“I wish he can accept to accompany me when I’m coming here, but he cannot he always*  
292 *asks me if he is the one carrying the pregnancy” (Grace)*

293 Women being chased out of the house with their crying children were a common form of  
294 psychological violence. Intimate partners had a tendency of telling the women to move  
295 out of their sight claiming that the children made noise that interrupted their peace and  
296 sleep. This made pregnant women feel bad since they expected their partners to first  
297 understand why the baby is crying and get involved in child care.

298 *“He tells me to carry away my child at night, that he doesn’t want noise .....*  
299 *(Rehema).*

300 *“When any of the children cries at night, he tells me to get off his sight with the crying*  
301 *child as if the child belongs to alone, it hurts!”(Jackline)*

302 Some women reported their children witnessing the violence and had nowhere to take the  
303 children to prevent them from witnessing the IPV incidences. This brought a lot of  
304 discomfort.

305 *“What pains me most is that our child witnesses us insulting each other and fighting so*  
306 *often I don’t know where to take the child” (Sarah)*

307 *“He talks to me any how even the presence of our children” (Maureen)*

### 308 **Sexual violence**

309 This was experienced in form of Uncomfortable sexual intercourse position and forced  
310 sexual intercourse.

311 Uncomfortable sexual position was one of the mentioned forms of sexual violence.  
312 Women claimed that their intimate partners enjoyed positioning themselves on top  
313 without caution and not listening to pregnant women's grievances, yet it's very painful  
314 and uncomfortable due to the gravid uterus.

315 *"Laughs....my husband wants to be on top of me during sexual intercourse yet am*  
316 *pregnant and I feel a lot of pain, I have told him that it's not comfortable but he does not*  
317 *listen he does it every day and it hurts me". (Rose)*

318 Some respondents reported forced sexual intercourse by their partners, especially after  
319 after being beaten by the intimate partner, women became annoyed, lost feelings and  
320 interest in coitus yet their partners pretended like nothing had happened and forced them  
321 into sexual intercourse. Respondents had no choice but to let their partners fulfill their  
322 sexual desires. There was also a common perception that a husband had the right to  
323 sexual intercourse at any time regardless of the women's choice.

324 *"Like he beats me, I get annoyed so I cannot have feelings for sexual intercourse , but*  
325 *he tells me to turn and he forces me, I have no choice since he is my husband but when*  
326 *there are no feelings and i feel it on my heart that I don't want to" (Doreen).*

327 *"My husband has bad behaviors, I come from the garden very tired and he forces me to*  
328 *have intercourse with him there and then yet he spends the whole day in bed" (Rehema).*

### 329 **Physical violence**

330 **This was experienced in form of being slapped, pushed, kicked, stepped on the**  
331 **abdomen and hit**

332 Women expressed concerns of being physically violated on a daily basis while pregnant.  
333 This sometimes left women with serious bruises.

334 *"... Am now pregnant but he beats me almost every day. He slaps, pushes, kicks and hits*  
335 *me with his fists most of the time" (Joan).*

336 Some of these fights emanated from refusal of the women to follow the husband's  
337 commands, Rose was not spared by her intimate partner after failing to listen to orders of  
338 carrying a bunch of bananas commonly known as "Matooke" from the banana plantation.  
339 She knew pregnancy consequences of carrying heavy loads. She wished her husband was

340 considerate such that he can perform the heavy duties by himself. Rose obeyed after a  
341 slap in fear of being hit again.

342 *“He slapped me on the back during this current pregnancy, he wanted me to carry a*  
343 *bunch of matoke from the banana plantation.....” (Rose).*

344 Doreen narrated how she was beaten by Robert her husband and reported that the  
345 violence escalated every time she conceived. The worst occurrence was stepping on her  
346 abdomen during the fight. Robert always ensured that he left marks on Doreen’s face.  
347 The couple already had children and Doreen claimed that she stayed for the children  
348 since she had no job and had nowhere to go with them. Doreen claimed Robert had  
349 another woman.

350 *“.....My husband beats me so badly, especially the time I’m pregnant, he recently*  
351 *stepped on my belly. Every time he beats me he ensures that he leaves a mark on*  
352 *me..... I can’t go anywhere with these children”. (Doreen)*

353 Marion recounted how she is always slapped on the face, ears and head. To her, most of  
354 the times her partner was interested in damaging her face. All this created bad feelings  
355 and anger.

356 *“My husband slaps me on the face, ears and head. I feel so bad and I’m always very*  
357 *angry”. (Marion)*

358 Meron voiced how her intimate partner fought and behaved like a drunkard every day.  
359 The fights would be triggered by trivial issues.

360 *“My husband is a fighter ... he slaps me every day he does things like for a drunkard yet*  
361 *he does not drink any alcohol”. (Meron)*

### 362 **Economical violence**

363 Economic violence was reported by the respondents and they expressed how their  
364 partners stopped them from working to earn money, not given money to seek health care,  
365 failure to buy food at home and non-involved in purchase of family assets.

### 366 **Lack of financial support**

367 Lack of financial support was one of the forms of economic violence reported. Olivia  
368 claimed that her intimate partner had money but refused to pay money for rent, school  
369 dues for the children and failed to buy food for the family yet he wanted to eat at home.

370 This left Olivia stuck with no constructive solution but to tolerate him as the father of the  
371 children and man of the house.

372 *“You can see that he has money but does not pay for us rent, school fees and food, yet in*  
373 *the morning he wants to eat..... (Cries), but I have nothing to do he is the father of my*  
374 *children.....” (Olivia)*

375 Sharon narrated how Peter her husband wasn't leaving any money at home for food and  
376 other home expenses most of the times Peter claimed that he had no money yet he came  
377 back home late and drunk on a daily basis and this kept Sharon wondering where Peter  
378 got the money to buy alcohol. She always dedicated her partner to God with hope to  
379 change into a responsible man.

380 *“He always leaves no money and food at home, he comes back towards morning drunk. I*  
381 *keep praying and dedicating him to God with hope that he will change”.* (Sharon)

382 Women expressed their concern about how their intimate partners failed to provide  
383 money for transport to seek for medical care and Antenatal care attendance. Sometimes  
384 intimate partners ignored these women when they were sick. Women required money for  
385 transport and money for food since there are long waiting queues at the facilities. Women  
386 believed that this highly contributed to delay in seeking ANC services and sometimes  
387 missing appointments.

388 *“My husband cannot give me care, like i want to go the health facility, he cannot give me*  
389 *transport and money to buy something to eat on the way so I have to look for it and that*  
390 *is a big problem ....., i buy each and everything by self”.* (Teddy)

391 *“I tell him am sick but he takes it easy like am not sick he ignores me without giving me*  
392 *money to go to the health facility....., I look for fees for the children and yet I have a*  
393 *partner it bothers me ....”.*(Doreen)

#### 394 **Women as sole family breadwinners**

395 Some women claimed to be sole family bread winners and where their main source of  
396 income was small scale farming to enable women cater for some basic needs like soap  
397 and food. Majority were bothered because they provided everything for the family  
398 without intimate partner's contribution. Women expressed bad feelings about this and  
399 admitted that it's not an easy situation.



400 *I usually do some small farming to cater for all the basic needs in the home, he provides*  
401 *nothing.” (Rehema)*

402 *“I usually plant beans when the season is good I sell them and I get some money for*  
403 *basic needs at home, he doesn’t give us anything.”( Merab)*

404 **Deprived of gainful employment**

405 Norah narrated how she was stopped from gainful employment by her intimate partner  
406 despite the fact that she attained formal education. This was painful and quite disturbing  
407 because Norah’s spouse was not providing all her financial needs. She had a perception  
408 that what kept the relationship going was the love she had for her partner.

409 *“I studied but my husband does not want me to work yet he cannot give me all I want.*

410 *Since I love him I just bear and I receive whatever he gives me but I keep on having bad*  
411 *thoughts”( Norah).*

412 **Taking away all the money**

413 Olivia described how her partner started a shop for her but the most distressing part was  
414 that she was never allowed to directly handle and plan for the money generated from the  
415 shop. Her partner routinely takes all the money collected without giving her a single  
416 penny, he refills the shop and buys home items by himself. Even when paying a visit to  
417 Olivia’s parents he decides alone and buys what to carry. These made Olivia feel like a  
418 shop attendant not a wife and a shareholder. It was so disturbing to request for all her  
419 personal and home use requirements from her partner. Her wish was to be given the  
420 freedom to plan for the money or be paid a monthly salary since she had personal  
421 problems that needed money.

422 *My husband started a shop for me but every time he comes he picks all the money*  
423 *generated I can never handle money, he re-fills items s for himself am like a shop*

424 *attendant not a wife and as a woman I also have some things that I would want to buy*

425 *(Olivia)*

426 There was also a tendency of intimate partners taking away all the money even when the  
427 business starting capital belonged to the woman. Rose described how she received money  
428 from her mother and started a hair dressing salon but her husband Denis was always  
429 interested in taking away all the money made. Even when she is bargaining with the  
430 customer Denis stands nearby to know how much is to be paid. This would lead to a  
431 physical fight if Rose hesitated to hand in the money. It became so much painful when  
432 the Rose wanted to seek for medical care and the partner fails to provide money for costs  
433 involved.

434 *“I have a salon that I started with my own money, but he takes all the money I make, even*  
435 *when I’m bargaining with the customers he is always around to know how much the cost*  
436 *will be...” (Rose)*

437 Non-involvement in the purchase of family assets was voiced. Respondents reported that  
438 intimate partners bought property for example land without informing or consulting  
439 women. Incidences of hearing about the new developments from the partner’s friends and  
440 sometimes relatives were reported. Some women had no answers why this happened,  
441 though others attributed it to disrespect since most of these women had no sources of  
442 income to contribute to the family’s properties bought. And other thought that their  
443 partners could be planning to marry other women.

444 *“He buys property without telling me, if I get lucky I hear it from friends.....it really*  
445 *hurts” (Emily)*

446 *“He buys family property like land without informing me, I think he does not involve me*  
447 *because I have no source of income to contribute money, but I cannot be sure he could be*  
448 *buying it to marry another woman....”( Joyce)*

449 **Theme two: Support seeking**

450 Participants were probed whether they sought help after IPV experience and a number of  
451 them sought support through informal and formal means, as mentioned in the quotations.  
452 Informal support was from respondents’ biological relatives like mothers, siblings, and  
453 fathers. A few sought support from their mother in laws and friends. Others never sought  
454 support due to lack of whom to confide in and fear of being laughed at.

455 *“I usually tell my mother and she counsels me” (Miriam).*

456 *“I usually tell my father all my experiences sometimes he sends money to support*  
457 *me....When it’s too tough he encourages me to come back home and rest” (Bridget)*

458 It was voiced that spouse’s friends had a tendency to withdraw from the matter after  
459 disclosure. Also it appeared that these friends had no experience in handling intimate  
460 partner violence issues since they never called back to inquire about the progress in  
461 regard to the disclosed violence, some participants felt these friends withdrew to maintain  
462 their relationship with the perpetrator.

463 *“I told his friend about the violence, he was shocked about everything and promised to*  
464 *talk to him. I expected his friend to call back first and give feedback which he never did,*  
465 *so i called and confirmed that they met and talked, you see it didn’t help much I wish I*  
466 *had kept quiet.....” (Godwin).*

467 Some respondents never sought support due to lack of trust and others reported to the  
468 human rights organizations and others to police depending on the severity of IPV and  
469 some observed change thereafter.

470 *“If he beats me every day I report to the police or human rights organizations such that*  
471 *he is threatened and sometimes counseled” (Lydia)*

472 *“Look at the scar on my face, I sustained it when he hit me hard and I reported him to*  
473 *police and he later changed his behaviour” (Miriam)*

#### 474 **Barriers to support seeking**

475 Some women never sought support due to trust issues, threats from the perpetrator and  
476 fear of the perpetrator’s knowledge about any support sought.

477 Some respondents believed that those they sought help from would spread the rumors to  
478 non-significant others that would instead laugh at them. Some found it difficult to  
479 identify people they trusted to provide support with some reporting that they had no  
480 biological mothers which made it difficult to identify someone to confide in thus waiting  
481 patiently for the husband to change.

482 *“I look for whom to tell ...laughs. Anyone I tell will laugh at me and will go telling others*  
483 *that I was beaten so I decide to keep quiet” (Marion).*

484 *“I have no mother, I therefore keep my problems and I try to talk to my husband such*  
485 *that he can change” (Teddy).*

486 Some received constant threats from the violent partner who warned not to tell anyone  
487 about the ongoing violence claiming that they would abandon the women with the  
488 children and never to back. This controlled the women since majority were housewives  
489 with no gainful income to financially support the children.

490 *“He threatens me that when he beats me or mistreats me and I go to police or tell any*  
491 *other legal authorities he will abandon me and never to come back, I cannot afford the*  
492 *finances to care for my children so when I hear that I cool and leave everything”*  
493 **(Emily).**

494 Others feared that their husbands would become more violent after knowing that a third  
495 party had been involved. Some had experienced the worst violence after involving  
496 someone else in these family issues. This restricted respondents to only seek support from

497 biological mothers they fully trusted, with surety that the perpetrator won't know about  
498 the support sought.

499 *“One time I told my brother in law about our problems in the home, when he talked to*  
500 *my husband about it, the violence increased! That night he beat me up terribly, he*  
501 *strangled me like he wanted to kill me. So I can now only tell my mother since I know the*  
502 *information will not get back to him.....” (Sarah)*

### 503 **Midwives' involvement**

504 Participants were further probed to know if they sought support from midwives.  
505 Surprisingly none had ever done so due to different perceptions. Some women wondered  
506 how to start involving health care providers in marital issues. Participants generally  
507 thought that IPV is not a health care provider's role. To them health care workers were  
508 supposed to measure their blood pressure, perform abdominal examination and provide  
509 treatment and they voiced that healthcare providers never inquire about IPV:

510 *“I wonder how I begin telling her. Now how do you begin? .....That's not her work!*  
511 *“(Jackline)*

512 *“Their work is to educate us about diet, what to bring to the hospital at the time of*  
513 *delivery (Annette).*

514 *Why should she even ask me how my husband is treating me! Is she my aunt? I have come*  
515 *to check for pregnancy. “(Beatrice).*

516 *“Sometimes I feel like telling a midwife but I wonder where to start from. She has not*  
517 *asked how things are at home I have come for antenatal care and I start saying problems*  
518 *at home no....(Norah).*

519 *If she asks me then I can get where to start from but they speak to us rudely.” (Merab)*

520 *“You are the first one I have seen asking me” (Godwin).*

521 *“Even you, I wouldn't have told you if you had not asked me.*

522 *They don't ask...they also have their own problems and they start asking about my own*  
523 *problems instead they will put their stress on me” (Imelda).*

### 524 **Theme three: IPV coping strategies among pregnant women**

525 Participants experiencing IPV during the index pregnancy mentioned coping strategies  
526 including: confiding in their relatives especially mothers of the victim, a few to mother  
527 in-laws, keeping quiet, self-consolation, partner tolerance, reporting to authorities,  
528 disrupting negative thoughts, praying to God, state of resignation, consideration of man  
529 as a dominant figure, understanding spouse's likes and dislikes, saying yes to everything  
530 and belief that all men are the same.

### 531 **Confiding in relatives**

532 The most common confidants were the biological mothers of the victims who often  
533 encouraged their daughters to stay in the relationship despite the IPV incidents. Most of  
534 them were advised by their mothers to always keep quiet as a way of creating a peaceful  
535 situation when their partners started quarreling. To these women talking to a confidant  
536 like a mother relived stress.

537 *".....my mother always tells me to keep quiet and ignore him."* **(Godwin)**

538 *"When I had problems with my husband, I talked to my sister she counseled me and told  
539 me to be strong and patient and indeed I became strong and managed"* **(Joan).**

540 A few like Rehema confided in their mother in laws. Rehema was close to her mother in  
541 law and they would do gardening together this made it easy for her to share her  
542 experiences, Rehema's mother in law encouraged her to be patient giving her hope of  
543 success in future.

544 *"I first told my mother in law about the violence, she told me to be patient"* **(Rehema).**

### 545 **Keeping Quiet**

546 Doreen revealed that she keeps quiet and pretends to be a fool in response to the  
547 violence caused by her partner. Doreen's perception was that keeping quiet prevents  
548 escalation to physical violence.

549 *"Most of the times he quarrels and I pretend to be a fool so I always keep quiet to avoid  
550 slaps and punches..."* **(Doreen).**

551 Though there were mixed feelings where by some women benefited from silence while  
552 others did not. Marion narrated that sometimes she tried to keep quiet but her husband  
553 instead became more furious complaining that Marion was stubborn due constant  
554 silence.

555 *“Most of the times I keep quiet though that makes him more furious that I’m stubborn*  
556 *and bigheaded and damn, hmmm it’s not easy.”(Marion)*

557 Others felt that their opinions were not valued by their intimate partners hence keeping  
558 quiet was the best solution.

559 *“Even if I argue he will not value my opinion so I just keep quiet” (Joyce).*

#### 560 **Praying to God**

561 Respondents also coped by getting closer to God through meditation and prayer when  
562 IPV occurred. Others approached their Pastors to pray for them.

563 *I always pray to God and my pastor prays for me (Jackline).*

564 *I usually dedicate him to God, When you keep on praying God changes him..... (Grace).*

#### 565 **Disrupting negative thoughts**

566 Some coped through disrupting negative thoughts and replacing them by thinking about  
567 other good things like friends to have a piece of mind.

568 *“I try to think about other good things like my friends such that I take away all the bad*  
569 *thoughts.”(Joyce)*

#### 570 **Reporting to authorities**

571 Reporting to authorities was one of the adapted coping ways. Women believed that their  
572 husbands respected the local council, non-governmental organizations and the police.

573 *“My husband hit me hard.....that I didn’t want to give him a child, thank God I had*  
574 *conceived though we hadn’t known. I reported him to Police” (Bridget).*

#### 575 **Self-consolation**

576 Due to cultural concerns, public opinion towards marriage and public respect accorded to  
577 married women there was a tendency of coping through self- consolation. For Sarah’s  
578 perception was that in their culture a woman without a spouse is undermined and  
579 disrespected by the community. To maintain this perceived respect and social reputation,  
580 Sarah consoled herself and stayed in the violet relationship.

581 *I console myself with the public picture for the respect of being married..... Many people*  
582 *around will not respect me when I have no husband” (Sarah).*

583 Despite the intimate partner's violent behaviors, others consoled themselves when the  
584 partner was constructive in terms of home building, paying school fees for the children  
585 and providing food for the family. This was a fundamental comfort to remain in the violent  
586 relationship. Women under this category felt better than other women in violent  
587 relationships whose intimate partners fail to sustain the family financially.

588 *"His behaviors are bad but he is constructive, he pays fees for the children and he*  
589 *ensures we have food so I console myself that I'm better than many out there"* (Meron).

#### 590 **Partner tolerance**

591 Some tolerated their partners despite the IPV experience because of lack of alternatives  
592 including financial support and the fear of abandoning her and the children. There was  
593 also an element of partner tolerance as long as the intimate partner was still interested in  
594 having sexual intercourse. Sexual intercourse influenced the belief that there was still  
595 love between them and also dispelled worries of the partner having extramarital  
596 relationships.

597 *"I have nothing else to do, once he does not want to talk to me but gives me money to*  
598 *buy food and he is willing to have sexual intercourse with me, then I can bear him the*  
599 *way he is....."* (Irene).

#### 600 **Man as a dominant force**

601 A tendency of women considering their intimate partners (Men) as superior was cited.  
602 Respondents mentioned that a woman cannot compete with a man since he can easily  
603 beat her. To them the solution was keeping quiet when violence sets in.

604 *"You cannot compete with a man, if I become stubborn, he can slap me....."* (Norah).

#### 605 **State of resignation**

606 A state of resignation was noted. Some respondents had histories of prior relationships  
607 that were violent. This forced some to withstand the violence in fear of being blamed by



608 the society as complicated women and these partly blamed themselves and had to remain  
609 in the relationship.

610 *“I decided to bear the situation because this is my second relationship, my first partner  
611 used to mistreat me and I left him..... If I decide to quit now people will judge me as the  
612 complicated one” (Merab)*

#### 613 **Understanding spouse’s likes and dislikes**

614 Understanding what the spouse liked or hated was voiced as one of the coping strategy.

615 *“I have managed by trying hard to know what he likes and what he hates, hmmm.....,”  
616 (Olivia)*

#### 617 **Saying yes to everything:**

618 *“Whatever he says whether wrong or right I say yes yes...to avoid being beaten”  
619 (Norah)*

#### 620 **Belief that all men are the same**

621 Some participants believed that all men are them and believed that everyone has a  
622 specific burden to tolerate in a relationship.

623 *I accepted him the way he is, because it’s not different in other families, everyone has a  
624 cross to carry” (Olivia)*

#### 625 **Theme four: Intergenerational continuity of IPV**

626 Intergenerational continuity of IPV was noted, where some of the participants voiced  
627 that their Mothers in laws interrelated to how they also went through the same violence  
628 with the respondents’ father in laws. This made most of the respondents calm down after  
629 realizing that their mothers in laws have gone through such IPV experience.

630 *“My mother in law told me to be patient that’s how his father used to treat her! You will  
631 succeed one day...” (Rehema).*

#### 632 **Discussion**

633 This study explored the pregnant women’s IPV experiences, support seeking and coping  
634 strategies in Southwestern Uganda. We report women’s voices of IPV experience in form  
635 of physical, psychological, sexual and economic violence. Women preferred sharing IPV  
636 experiences with their biological mothers to midwives or any other person. The main

637 support given by their support systems was encouraging the victims to maintain their  
638 marriage and keeping quiet when the partner starts quarreling. Pregnant women did not  
639 know the role of midwives in mitigating IPV and the midwives' did not investigate about  
640 the IPV experience during Antenatal care contacts. Women coped by confiding in their  
641 relatives, keeping silent, self-consolation, tolerance of the perpetrator, distracting bad  
642 thoughts through thinking about good things like friends, self-blame and praying to God  
643 and intergenerational continuity of violence was narrated.

#### 644 **IPV experienced by pregnant women**

645 Current findings reveal that women experienced various types of IPV including  
646 psychological, physical, sexual and economic violence. This is comparable to previous  
647 studies that reported psychological violence physical, sexual (5, 13, 19) and economic  
648 violence (6, 14). A number of women expressed their concern on economic violence  
649 where they claimed that spouses had money but ignored their financial needs that  
650 included paying money for rent, school fees for the children, buying food for the family.  
651 This situation can intensify the violence since in African settings men are traditionally  
652 considered as family breadwinners. This is supported by previous studies which asserted  
653 that women are never breadwinners but have supportive roles in families (10, 56). In the  
654 African tradition it is known that a man should be economically able and willing to  
655 provide almost everything to the family including providing for the wife (11). Studies  
656 have affirmed that when women are left to be the main source of family survival,  
657 instabilities and divorce may set in(57, 58).

658 Non-involvement in purchase of family assets and restriction in obtaining gainful  
659 employment was voiced by the respondents and others who were allowed to work all the  
660 money was taken away from them. This is in agreement with aforementioned studies (51,  
661 59-61), that economic violence was widespread where violent partners impede women's  
662 employment, access to financial resources and isolation from domestic financial  
663 information. This creates economic dependency on the perpetrator, forcing women to beg  
664 for everything and become more controlled. Studies have consistently demonstrated that

665 economic dependence is the primary obstacle victims face in attempting to leave violent  
666 relationships (7, 8, 62). Women need to be empowered with personal development skills,  
667 education and knowledge on problem solving skills to reframe their situation and regain  
668 power from the perpetrator.

669 Women narrated how their partners insisted on uncomfortable sexual positions  
670 specifically man on top commonly known as the missionary style. This is consistent with  
671 previous studies (63-67) where the missionary style remained common position  
672 throughout pregnancy. During pregnancy increase in abdominal volume and girth makes  
673 this common position more difficult and uncomfortable (67). Sexual intercourse  
674 shouldn't be abridged to the man's interest: pregnant woman's satisfaction, comfort and  
675 enjoyment should also be considered. Due to societal norms, women may not freely talk  
676 about these sexual issues (64, 68) and continue with such experience while trying to  
677 fulfill marital obligations. Consequently midwives in the prenatal clinics should have the  
678 initiative to facilitate, educate and counsel pregnant women and their partners on  
679 appropriate sexual positions, particularly after 20 weeks of gestation to keep pressure and  
680 weight off the abdomen and positions that keep the woman off the back to avoid potential  
681 blood flow compression that can lead to discomfort, fainting and other issues. The  
682 recommended sex positions during pregnancy include woman on hands and knees,  
683 woman on top, seated pregnancy sex, side by side, use of pregnancy pillows (69, 70) for  
684 support and more comfort.

685 Intergenerational violence was voiced by the respondents, this is in line with earlier  
686 studies (71-74) that reported experience of violence during childhood contributes to  
687 victimization and perpetration during adulthood. This can be attributed to lack of  
688 maternal-infant bonding during the period of IPV experience which affects the child's  
689 development and behavior (75), also the tendency of children demonstrating their  
690 parents' behavior and act the same in their relationships during adulthood. It is therefore  
691 important to identify victims early which can enhance timely intervention and minimize  
692 on the future consequences.

693 **Support seeking and midwives involvement**

694 Women preferred seeking support informally from their biological relatives compared to  
695 midwives or any other person. The results are similar to previous studies (76, 77).  
696 Women sought support specifically from their birth relatives probably due to the primary  
697 bonding, security and the trust they have in their biological relatives. It is reported that  
698 women have a strong link with the family of origin (76). Having somebody to confide in  
699 should be credited since it is recounted that lack of victim family support acts as a barrier  
700 to terminating IPV (78). Another reason why women prefer to confide in their natal  
701 relatives is because they fear that their intimate partner's family would support their son  
702 and prevent the issue from being resolved. Fear of the perpetrator discovering that a third  
703 party was involved is another possibility, since victims normally reside far from their  
704 biological relatives, it makes it difficult for the abusive partner to learn about the support  
705 being sought. It is reported that fear of the perpetrator negatively affects support seeking  
706 (79). The current findings are contrary to the study by Amel Barez et al (80) where the  
707 bulk of the women never asked for help and kept their experiences with perinatal IPV  
708 hidden..

709 Interviews revealed that the participants in the current study were unaware of the role that  
710 midwives play in IPV. The expert opinion in an earlier studies indicate that women are  
711 less likely to reveal violence to institutions such as health facilities because they appear to  
712 be more formal, and they do not know what formal measures would be taken when health  
713 care providers are involved to stop further violence (36, 42). Nurses and Midwives form  
714 the biggest healthcare workforce in Sub-Saharan Africa (81) and most of the prenatal  
715 clinics in these settings are operated by midwives so their role and responsibility in IPV

716 control and management is crucial. As part of this, IPV screenings are conducted,  
717 resources are provided to victims, women who sustain physical injuries are treated, the  
718 victim's and significant others' safety is assessed, the findings are properly documented,  
719 emotional support is provided, and appropriate referrals are made (75). Many women  
720 may focus more on the immediate solution to stopping the violence and neglect to  
721 consider how IPV impacts them in the long run. Health care providers responsible for  
722 maternal and child health, specifically midwives, are encouraged to educate pregnant  
723 women about their role in preventing IPV, to elaborate on the consequences of IPV  
724 during pregnancy, as well as to actively screen pregnant women for IPV and offer  
725 support. By doing so, women will realize and appreciate that care providers play an  
726 important role in this regard, and this will help them break the cycle of IPV.

### 727 **Coping strategies**

728 Among the coping strategies used by pregnant women in this study were confiding in  
729 someone commonly their biological mothers, partner tolerance, self-consolation, self-  
730 blame, keeping quiet, thinking of other good things like friends, praying to God, and  
731 others reported to authorities. This is comparable with a study done in Bangladesh where  
732 in particular, women used different strategic responses, including remaining silent, trying  
733 to divert their intimate partner's attention, protesting against the violence, and seeking  
734 help from others (82). Some of these coping mechanisms for example keeping quiet may  
735 shortly calm the situation since it prevents escalation to physical violence. On the other  
736 hand silence puts the victim at risk of continuous exposure to IPV due to the fact that it  
737 does not encourage dialogue between the partners to solve the conflict. It has been  
738 reported that persistent violence in intimate relationships leads to chronic stress, which  
739 survivors describe as painful and overpowering, posing a threat to their physical and  
740 social self (83). IPV results in significant morbidity and disability among women with the  
741 biggest impact on their reproductive and mental health (84). Traumatic stress is thought  
742 to be the main mechanism that explains why exposure to intimate partner violence may

743 cause subsequent depression and suicide attempts to the mother as previously reported  
744 (85). This also affects the fetus. The fetal effects include: preterm delivery, low birth  
745 weight, fetal death (34, 86) and if the baby survives with continuous IPV exposure, is  
746 highly likely to be at risk of adult victimization and perpetration (74, 75).

747 Findings show that women resorted to praying to God and involving religious leaders to  
748 pray for them. This is echoed in previous studies (43, 44). Not different from a previous  
749 study (87), in the current study women hoped that their intimate partners would change if  
750 they continued praying for them. It has been documented that religious coping can benefit  
751 the victims through reshaping their perceptions and institute new behaviors, and can  
752 support recovery by providing hope and preventing feelings of powerlessness (88).  
753 Though too much devotion in prayer can at times be dangerous since some women may  
754 go to the extreme of spending much of the time in churches praying including overnights,  
755 others stop working and spend all the time praying which can worsen the relationship  
756 with their partners due to long periods of absence at home. Women voiced reporting IPV  
757 experience to authorities like police when IPV became severe remarkably associated with  
758 injuries. This is in agreement with reports from previous studies which showed that  
759 victims sought for help when the IPV experience was severe and could not endure  
760 anymore (37, 76). This indicates that some women can tolerate IPV when it's not severe  
761 and life threatening which is not healthy since any level of IPV has significant  
762 consequences to the women, fetus, children and other family members.

### 763 **Conclusion**

764 Pregnant women continue to live in violent relationships with various coping strategies  
765 and women are not aware of the midwives' role in IPV. These findings point to the need  
766 for the health care system to reflect on the care provided to these women in our health  
767 centers, community clinics and hospitals in response to women who are not aware that  
768 family IPV can be discussed with health professionals. Officers in charge of maternal and  
769 child health need to develop and incorporate a user friendly IPV screening tool onto the  
770 ANC card, ensure midwives and obstetricians professional training on the process of IPV  
771 identification and management, mentoring and supervision to enhance routine IPV

772 screening, also recruit counselors and peer support specifically for pregnant women in the  
773 prenatal clinics to provide individualized psychological support. Professional health  
774 education talks on sexual positions during pregnancy need to be emphasized during ANC  
775 classes and community outreaches to prevent sexual violence in regard to uncomfortable  
776 positions. Policy makers in maternal and child health department should develop a  
777 protocol for care of women identified to have suffered from IPV, ensure follow up  
778 mechanisms for continuum of care.

### 779 **Study strength and limitations**

780 One of our strength was achieving data saturation by interviewing a sample of 25 women  
781 experiencing IPV and attending ANC. The second strength was using qualitative methods  
782 of inquiry which are the best in understanding pregnant women's experiences and coping  
783 strategies. Also existing literature in our setting majorly considers psychological, physical  
784 and sexual violence, the current study reveals economic violence too. This study had  
785 some limitations. First the findings may not be transferable to rural health facilities since  
786 our study was based in the urban setting. Secondly this study relies on self-report, so  
787 recall bias and inaccuracy may be present. Nonetheless it contributes literature on IPV  
788 which is still a very fundamental topic. Future research should focus on triangulating  
789 views from rural health facilities and urban health facilities to appreciate the diverse  
790 views that can diminish the possible bias created by this concept.

### 791 **Acknowledgement**

792 The authors extend their gratitude to the First Mile Community Health program for the  
793 support during the time of the study. Great thanks to the Department of Community  
794 Health, Mbarara University of Science and Technology for the support rendered during  
795 the study. The authors would also like to acknowledge the study participants for their  
796 willingness and cooperation during the data collection process.

### 797 **Author's contribution**

798 KE, NJB and BV designed the study. KE participated in data collection. KE, NJB and  
799 AJB participated in data analysis. KE, NJB, AE, KA, NG, AJB and BV participated in  
800 original drafting, review and editing of the manuscript. All authors read and approved the  
801 final manuscript.

## 802 **Funding**

803 The research work was funded by the First Mile community health program though  
804 authors did not receive any financial support for authorship and publication of this study.  
805 Funders were not involved in the design of the study, data collection, analysis,  
806 interpretation, or writing the manuscript.

## 807 **Data Availability**

808 The data used to support the findings of this study are available from the corresponding  
809 author upon reasonable request.

810

## 811 **Consent for publication**

812 Participants gave their consent for the data to be used for research purposes. They were  
813 also assured that any information about them will be anonymized.

## 814 **Competing interest**

815 The authors declare that they have no competing interests.

## 816 **Disclosure**

817 The author reports no conflicts of interest in this work.

## 818 **References**

- 819 1. Loseke DR, Kurz D. Men's violence toward women is the serious social problem. Current  
820 controversies on family violence. 2005;2:79-96.
- 821 2. Lapierre S, Côté I. We are not there to solve the problem of domestic violence, we are  
822 here to protect the child: The conceptualization of domestic violence situations in a youth center  
823 in Quebec. Service Social. 2011;57(1):31-48.



- 824 3. Holmes MR. Long-Term Effects of Intimate Partner Violence on Children's Social  
825 Behavior: University of California, Los Angeles; 2012.
- 826 4. Daoud N, Smylie J, Urquia M, Allan B, O'Campo P. The contribution of socio-economic  
827 position to the excesses of violence and intimate partner violence among Aboriginal versus non-  
828 Aboriginal women in Canada. *Canadian Journal of Public Health*. 2013;104(4):e278-e83.
- 829 5. Stiller M, Bärnighausen T, Wilson ML. Intimate partner violence among pregnant women  
830 in Kenya: forms, perpetrators and associations. *BMC Women's Health*. 2022;22(1):1-25.
- 831 6. Katushabe E, Chinweuba A, Omieibi A, Asiimwe JB. Prevalence and Determinants of  
832 Intimate-Partner Violence among Pregnant Women Attending a City Health Centre IV, South  
833 western Uganda, during the COVID-19 Pandemic: A Cross-Sectional Study. *Student's Journal of*  
834 *Health Research Africa*. 2022;3(3):17-.
- 835 7. Fawole OI. Economic violence to women and girls: is it receiving the necessary  
836 attention? *Trauma, Violence, & Abuse*. 2008;9(3):167-77.
- 837 8. Buzawa ES, Buzawa CG. What does research suggest are the primary risk and  
838 protective factors for intimate partner violence (IPV) and what is the role of economic factors?  
839 *Journal of Policy Analysis and Management*. 2013:128-37.
- 840 9. Adams AE, Sullivan CM, Bybee D, Greeson MR. Development of the scale of economic  
841 abuse. *Violence against women*. 2008;14(5):563-88.
- 842 10. Akanle O, Adesina JO, Nwaobiala UR. Turbulent but I must endure in silence: Female  
843 breadwinners and survival in Southwestern Nigeria. *Journal of Asian and African Studies*.  
844 2018;53(1):98-114.
- 845 11. Akanle O, Nwaobiala UR. Changing but fragile: Female breadwinning and family stability  
846 in Nigeria. *Journal of Asian and African Studies*. 2020;55(3):398-411.
- 847 12. Garcia-Moreno C, Jansen HA, Ellsberg M, Heise L, Watts CH. Prevalence of intimate  
848 partner violence: findings from the WHO multi-country study on women's health and domestic  
849 violence. *The lancet*. 2006;368(9543):1260-9.
- 850 13. Owaka IO, Nyanchoka MK, Atieli HE. Intimate partner violence in pregnancy among  
851 antenatal attendees at health facilities in West Pokot county, Kenya. *Pan African Medical Journal*.  
852 2017;28(1).
- 853 14. Mahenge B, Stöckl H, Abubakari A, Mbwambo J, Jahn A. Physical, sexual, emotional and  
854 economic intimate partner violence and controlling behaviors during pregnancy and postpartum  
855 among women in Dar es Salaam, Tanzania. *PloS one*. 2016;11(10):e0164376.
- 856 15. Azene ZN, Yeshita HY, Mekonnen FA. Intimate partner violence and associated factors  
857 among pregnant women attending antenatal care service in Debre Markos town health facilities,  
858 Northwest Ethiopia. *PloS one*. 2019;14(7):e0218722.
- 859 16. Lencha B, Ameya G, Baresa G, Minda Z, Ganfure G. Intimate partner violence and its  
860 associated factors among pregnant women in Bale Zone, Southeast Ethiopia: A cross-sectional  
861 study. *PloS one*. 2019;14(5):e0214962.
- 862 17. Idoko P, Ogbe E, Jallow O, Ocheke A. Burden of intimate partner violence in The  
863 Gambia-a cross sectional study of pregnant women. *Reproductive health*. 2015;12(1):1-6.
- 864 18. UBOS I. Uganda Bureau of statistics (UBOS) and ICF. 2018. Uganda demographic and  
865 health survey. 2016.
- 866 19. Eputai J, Udho S, Auma AG, Nabirye RC. Intimate partner violence among pregnant  
867 women in Uganda. *African Journal of Midwifery and Women's Health*. 2019;13(2):1-5.
- 868 20. Katushabe E, Asiimwe JB, Batwala V. Intimate partner violence disclosure and  
869 associated factors among pregnant women attending a city hospital in South-Western Uganda: a  
870 cross-sectional study. *BMC pregnancy and childbirth*. 2022;22(1):1-9.
- 871 21. Abdollahi F, Abhari FR, Delavar MA, Charati JY. Physical violence against pregnant  
872 women by an intimate partner, and adverse pregnancy outcomes in Mazandaran Province, Iran.  
873 *Journal of family & community medicine*. 2015;22(1):13.
- 874 22. Al-adayleh LM, Al Nabulsi HH. Violence against pregnant women-The study population in  
875 salt city. *Asian Social Science*. 2013;9(2):257.
- 876 23. Miller GE, Chen E, Zhou ES. If it goes up, must it come down? Chronic stress and the  
877 hypothalamic-pituitary-adrenocortical axis in humans. *Psychological bulletin*. 2007;133(1):25.
- 878 24. Baird K, Creedy D, Mitchell T. Intimate partner violence and pregnancy intentions: a  
879 qualitative study. *Journal of clinical nursing*. 2017;26(15-16):2399-408.

- 880 25. Coker AL, Sanderson M, Dong B. Partner violence during pregnancy and risk of adverse  
881 pregnancy outcomes. *Paediatric and perinatal epidemiology*. 2004;18(4):260-9.
- 882 26. Young CR, Kaida A, Kabakyenga J, Muyindike W, Musinguzi N, Martin JN, et al.  
883 Prevalence and correlates of physical and sexual intimate partner violence among women living  
884 with HIV in Uganda. *PLoS One*. 2018;13(8):e0202992.
- 885 27. Garcia-Moreno C, Pallitto C, Devries K, Stöckl H, Watts C, Abrahams N. Global and  
886 regional estimates of violence against women: prevalence and health effects of intimate partner  
887 violence and non-partner sexual violence: World Health Organization; 2013.
- 888 28. Viellas EF, Gama SGNd, Carvalho MLd, Pinto LW. Factors associated with physical  
889 aggression in pregnant women and adverse outcomes for the newborn. *Jornal de pediatria*.  
890 2013;89:83-90.
- 891 29. Trevillion K, Oram S, Feder G, Howard LM. Experiences of domestic violence and mental  
892 disorders: a systematic review and meta-analysis. *PloS one*. 2012;7(12):e51740.
- 893 30. Sansone RA, Elliott K, Wiederman MW. Self-harm behaviors among female perpetrators  
894 of intimate partner violence. *Partner abuse*. 2016;7(1):44-54.
- 895 31. Aydin A, Gulec M, Boysan M, Selvi Y, Selvi F, Kadak MT, et al. Seasonality of self-  
896 destructive behaviour: seasonal variations in demographic and suicidal characteristics in Van,  
897 Turkey. *International journal of psychiatry in clinical practice*. 2013;17(2):110-9.
- 898 32. Gibson-McCrary D, Upchurch D. Treatment of women and domestic violence in Africa.  
899 *Journal of Gender, Information and Development in Africa (JGIDA)*. 2015;4(1\_2):57-69.
- 900 33. Kaye DK, Mirembe FM, Bantebya G, Johansson A, Ekstrom AM. Domestic violence as  
901 risk factor for unwanted pregnancy and induced abortion in Mulago Hospital, Kampala, Uganda.  
902 *Tropical Medicine & International Health*. 2006;11(1):90-101.
- 903 34. Koenig MA, Stephenson R, Acharya R, Barrick L, Ahmed S, Hindin M. Domestic violence  
904 and early childhood mortality in rural India: evidence from prospective data. *International journal  
905 of epidemiology*. 2010;39(3):825-33.
- 906 35. Murray CE, Crowe A, Brinkley J. The stigma surrounding intimate partner violence: A  
907 cluster analysis study. *Partner abuse*. 2015;6(3):320-36.
- 908 36. Katiti V, Sigalla GN, Rogathi J, Manongi R, Mushi D. Factors influencing disclosure  
909 among women experiencing intimate partner violence during pregnancy in Moshi Municipality,  
910 Tanzania. *BMC Public Health*. 2016;16(1):1-9.
- 911 37. Tenkorang EY, Sedziafa AP, Owusu AY. Does type and severity of violence affect the  
912 help-seeking behaviors of victims of intimate partner violence in Nigeria? *Journal of family issues*.  
913 2017;38(14):2026-46.
- 914 38. Mohammad-Alizadeh-Charandabi S, Bahrami-Vazir E, Kamalifard M, Mirghafourvand M.  
915 Intimate partner violence during the first pregnancy: A comparison between adolescents and  
916 adults in an urban area of Iran. *Journal of forensic and legal medicine*. 2016;43:53-60.
- 917 39. Hyde JS, Mezulis AH, Abramson LY. The ABCs of depression: integrating affective,  
918 biological, and cognitive models to explain the emergence of the gender difference in depression.  
919 *Psychological review*. 2008;115(2):291.
- 920 40. Craparo G, Gori A, Petruccioli I, Cannella V, Simonelli C. Intimate partner violence:  
921 relationships between alexithymia, depression, attachment styles, and coping strategies of  
922 battered women. *The Journal of Sexual Medicine*. 2014;11(6):1484-94.
- 923 41. Bakermans-Kranenburg MJ, Van Ijzendoorn MH. The hidden efficacy of interventions:  
924 Genex environment experiments from a differential susceptibility perspective. *Annual review of  
925 psychology*. 2015;66(1):381-409.
- 926 42. Sigalla GN, Rasch V, Gammeltoft T, Meyrowitsch DW, Rogathi J, Manongi R, et al.  
927 Social support and intimate partner violence during pregnancy among women attending antenatal  
928 care in Moshi Municipality, Northern Tanzania. *BMC Public Health*. 2017;17(1):1-12.
- 929 43. Itimi K, Dienye PO, Gbeneol PK. Intimate partner violence and associated coping  
930 strategies among women in a primary care clinic in Port Harcourt, Nigeria. *Journal of family  
931 Medicine and primary care*. 2014;3(3):193.
- 932 44. Laisser RM, Nyström L, Lugina HI, Emmelin M. Community perceptions of intimate  
933 partner violence-a qualitative study from urban Tanzania. *BMC women's health*. 2011;11(1):1-12.

- 934 45. Sayem AM, Khan MAU. Women's strategic responses to intimate partner violence: A  
935 study in a rural community of Bangladesh. *Asian Social Work and Policy Review*. 2012;6(1):23-  
936 39.
- 937 46. Khodabakhshi-Koolae A, Bagherian M, Rahmatizadeh M. Stress and coping strategies  
938 in women with and without intimate-partner violence experiences. *Journal of Client-Centered*  
939 *Nursing Care*. 2018;4(1):29-36.
- 940 47. Wortham TT. Resilience traits of African American women survivors of intimate partner  
941 violence (IPV): Mental health practitioner perspectives: Capella University; 2013.
- 942 48. WHO. WHO recommendations on antenatal care for a positive pregnancy experience:  
943 World Health Organization; 2016.
- 944 49. MoH U. Uganda Clinical Guidelines 2016 National Guidelines for Management of  
945 Common Conditions. Kampala, Uganda: Ministry of Health. 2016.
- 946 50. Creswell JW. Steps in conducting a scholarly mixed methods study. 2013.
- 947 51. Yount KM, Krause KH, VanderEnde KE. Economic coercion and partner violence against  
948 wives in Vietnam: a unified framework? *Journal of interpersonal violence*. 2016;31(20):3307-31.
- 949 52. Joffe H, Yardley L. Content and thematic analysis. 2003.
- 950 53. Garcia-Moreno C, Watts C, Heise L, Ellsberg M. Putting women first: Ethical and safety  
951 recommendations for research on domestic violence against women. 2001.
- 952 54. Skierka A-S, Michels KB. Ethical principles and placebo-controlled trials—interpretation  
953 and implementation of the Declaration of Helsinki's placebo paragraph in medical research. *BMC*  
954 *medical ethics*. 2018;19(1):1-12.
- 955 55. Lincoln YS, Guba EG. But is it rigorous? Trustworthiness and authenticity in naturalistic  
956 evaluation. *New directions for program evaluation*. 1986;1986(30):73-84.
- 957 56. Akanle O, Oluwakemi EO. Traditionalism and household chores in Ibadan, Nigeria.  
958 *International journal of sociology of the family*. 2012:203-24.
- 959 57. Munsch CL. Her support, his support: Money, masculinity, and marital infidelity. *American*  
960 *Sociological Review*. 2015;80(3):469-95.
- 961 58. Teachman J. Wives' economic resources and risk of divorce. *Journal of Family Issues*.  
962 2010;31(10):1305-23.
- 963 59. Sedziafa AP, Tenkorang EY, Owusu AY, Sano Y. Women's experiences of intimate  
964 partner economic abuse in the eastern region of Ghana. *Journal of Family Issues*.  
965 2017;38(18):2620-41.
- 966 60. Jury A, Thorburn N, Weatherall R. "What's his is his and what's mine is his": Financial  
967 power and the economic abuse of women in Aotearoa. *Aotearoa New Zealand Social Work*.  
968 2017;29(2):69-82.
- 969 61. Sanders CK. Economic abuse in the lives of women abused by an intimate partner: A  
970 qualitative study. *Violence against women*. 2015;21(1):3-29.
- 971 62. Tolman R. Impact of intimate partner violence on economic well-being. *CFS Research*  
972 *Brief*. 2011;5.
- 973 63. Jawed-Wessel S, Sevick E. The impact of pregnancy and childbirth on sexual behaviors:  
974 a systematic review. *The Journal of Sex Research*. 2017;54(4-5):411-23.
- 975 64. Bello FA, Olayemi O, Aimakhu CO, Adekunle AO. Effect of pregnancy and childbirth on  
976 sexuality of women in Ibadan, Nigeria. *International Scholarly Research Notices*. 2011;2011.
- 977 65. Gałazka I, Droszól-Cop A, Naworska B, Czajkowska M, Skrzypulec-Plinta V. Changes  
978 in the sexual function during pregnancy. *The journal of sexual medicine*. 2015;12(2):445-54.
- 979 66. Pauleta JR, Pereira NM, Graça LM. Sexuality during pregnancy. *The journal of sexual*  
980 *medicine*. 2010;7(1\_Part\_1):136-42.
- 981 67. Sacomori C, Cardoso FL. Sexual initiative and intercourse behavior during pregnancy  
982 among brazilian women: a retrospective study. *Journal of Sex & Marital Therapy*. 2010;36(2):124-  
983 36.
- 984 68. Keçe AC, Aydoğan Kırmızı D, Coşar F, Başer E, Sivaslıoğlu AA. Female sexual  
985 behaviour and perception during pregnancy: A questionnaire-based study. 2023.
- 986 69. Senkumwong N, Chaovisitsaree S, Rugpao S, Chandrawongse W, Yanunto S. The  
987 changes of sexuality in Thai women during pregnancy. *J Med Assoc Thai*. 2006;89(4):124-9.

- 988 70. Afshar M, Mohammad-Alizadeh-Charandabi S, Merghti-Khoei E-S, Yavarikia P. The  
989 effect of sex education on the sexual function of women in the first half of pregnancy: a  
990 randomized controlled trial. *Journal of caring sciences*. 2012;1(4):173.
- 991 71. Sousa C, Herrenkohl TI, Moylan CA, Tajima EA, Klika JB, Herrenkohl RC, et al.  
992 Longitudinal study on the effects of child abuse and children's exposure to domestic violence,  
993 parent-child attachments, and antisocial behavior in adolescence. *Journal of interpersonal*  
994 *violence*. 2011;26(1):111-36.
- 995 72. McKinney CM, Caetano R, Ramisetty-Mikler S, Nelson S. Childhood family violence and  
996 perpetration and victimization of intimate partner violence: Findings from a national population-  
997 based study of couples. *Annals of epidemiology*. 2009;19(1):25-32.
- 998 73. Abramsky T, Watts CH, Garcia-Moreno C, Devries K, Kiss L, Ellsberg M, et al. What  
999 factors are associated with recent intimate partner violence? Findings from the WHO multi-  
1000 country study on women's health and domestic violence. *BMC public health*. 2011;11(1):1-17.
- 1001 74. Williams H, Foster D, Watts P. Perinatal domestic abuse: Midwives making a difference  
1002 through effective public health practice. *British Journal of Midwifery*. 2013;21(12):852-8.
- 1003 75. Grier G, Geraghty S. Intimate partner violence and pregnancy: how midwives can listen  
1004 to silenced women. *British Journal of Midwifery*. 2015;23(6):412-6.
- 1005 76. Sigalla GN, Mushi D, Gammeltoft T. "Staying for the children": The role of natal relatives  
1006 in supporting women experiencing intimate partner violence during pregnancy in northern  
1007 Tanzania—A qualitative study. *PLoS One*. 2018;13(6):e0198098.
- 1008 77. Okenwa L, Lawoko S, Jansson B. Factors associated with disclosure of intimate partner  
1009 violence among women in Lagos, Nigeria. *Journal of injury and violence research*. 2009;1(1):37.
- 1010 78. Ilika AL. Women's perception of partner violence in a rural Igbo community. *African*  
1011 *journal of reproductive health*. 2005:77-88.
- 1012 79. Spangaro JM, Zwi AB, Poulos RG, Man W. Who tells and what happens: disclosure and  
1013 health service responses to screening for intimate partner violence. *Health & Social Care in the*  
1014 *Community*. 2010;18(6):671-80.
- 1015 80. Amel Barez M, Babazadeh R, Latifnejad Roudsari R, Mousavi Bazaz M, Mirzaii  
1016 Najmabadi K. Women's strategies for managing domestic violence during pregnancy: a  
1017 qualitative study in Iran. *Reproductive health*. 2022;19(1):58.
- 1018 81. Saralegui-Gainza A, Soto-Ruiz N, Escalada-Hernández P, Arregui-Azagra A,  
1019 García-Vivar C, San Martín-Rodríguez L. Density of nurses and midwives in sub-Saharan Africa:  
1020 Trends analysis over the period 2004–2016. *Journal of Nursing Management*. 2022;30(8):3922-  
1021 32.
- 1022 82. Sayem AMaMUAK. 'Women's Strategic Responses to Intimate Partner Violence: A Study  
1023 in a Rural Community of Bangladesh', *Asian Social Work and Policy Review* 6(1): 23–39. 2012  
1024 6(1).
- 1025 83. Miller GE, Chen E, Zhou E.S. . If it goes up, must it come down? Chronic stress and the  
1026 hypothalamic-pituitary-adrenocortical axis in humans. . *Psychol Bull*. 2007;133:25-45.
- 1027 84. Trevillion K, Oram S, Feder G, Howard LM. Experiences of domestic violence and mental  
1028 disorders: a systematic review and meta-analysis. *PLoS One*; 7: e51740. 2012.
- 1029 85. Hyde JS, Mezulis A.H, Abramson L.Y. . Hyde JS, Mezulis AH, Abramson LY. The ABCs  
1030 of depression: integrating affective, biological, and cognitive models to explain the emergence of  
1031 the gender difference in depression. *Psychological Review*., 2008;115(2):291–313.
- 1032 86. Sanjel S. Gender-based violence: a crucial challenge for public health. *Kathmandu*  
1033 *University medical journal*. 2013;11(2):179-84.
- 1034 87. McMullin S, Nason-Clark N, Fisher-Townsend B, Holtmann C. When violence hits the  
1035 religious home: Raising awareness about domestic violence in seminaries and amongst religious  
1036 leaders. *Journal of Pastoral Care & Counseling*. 2015;69(2):113-24.
- 1037 88. Fowler DN, Rountree MA. Exploring the meaning and role of spirituality for women  
1038 survivors of intimate partner abuse. *Journal of Pastoral Care & Counseling*. 2009;63(3-4):1-13.
- 1039  
1040
